# Supplementary material for: Snakebite associated thrombotic microangiopathy: a systematic review of clinical features, outcomes, and evidence for interventions including plasmapheresis
Source: PubMed Central journal article supplement (PMC7748274; doi:10.1371/journal.pntd.0008936), 2020-12-08
Supplement: pntd.0008936.s003.pdf [file pntd.0008936.s003.pdf]

**S2 Table. Full search strategy for PubMed**

| Search # | Search term<br>(controlled vocabulary MeSH term or free text words) |
|----------|---------------------------------------------------------------------|
| #1       | snakes [MeSH Terms]                                                 |
| #2       | snake bites [MeSH Terms]                                            |
| #3       | venoms [MeSH Terms]                                                 |
| #4       | #1 OR #2 OR #3                                                      |
| #5       | thrombotic microangiopathies [MeSH Terms]                           |
| #6       | thrombosis [MeSH Terms]                                             |
| #7       | erythrocytes [MeSH Terms]                                           |
| #8       | schistocyt* [Text Words]                                            |
| #9       | anemia, hemolytic [MeSH Terms]                                      |
| #10      | hemolysis [MeSH Terms]                                              |
| #11      | “red cell” [Text Words]                                             |
| #12      | fragment* [Text Words]                                              |
| #13      | #11 AND #12                                                         |
| #14      | kidney diseases [MeSH Terms]                                        |
| #15      | multiple organ failure [MeSH Terms]                                 |
| #16      | #5 OR #6 OR #7 OR #8 OR #9 OR #10 OR #13 OR #14 OR #15              |
| #17      | #4 AND #16                                                          |

\* truncated search term. MeSH: medical subject headings.
