# Supplementary material for: Snakebite associated thrombotic microangiopathy: a systematic review of clinical features, outcomes, and evidence for interventions including plasmapheresis
Source: PubMed Central journal article supplement (PMC7748274; doi:10.1371/journal.pntd.0008936), 2020-12-08
Supplement: pntd.0008936.s004.pdf [file pntd.0008936.s004.pdf]

**S3 Table. Definitions for unifying and categorising data**

| Study variable or outcome                                     | Plan to unify or categorise data                                                                                                                                                                                                                                                                                                  |
|---------------------------------------------------------------|-----------------------------------------------------------------------------------------------------------------------------------------------------------------------------------------------------------------------------------------------------------------------------------------------------------------------------------|
| <b>MAHA</b>                                                   |                                                                                                                                                                                                                                                                                                                                   |
| Haemoglobin nadir                                             | Lowest recorded haemoglobin in g/L                                                                                                                                                                                                                                                                                                |
| Time to haemoglobin nadir                                     | Time to lowest recorded haemoglobin in g/L from snake bite (hours and minutes)                                                                                                                                                                                                                                                    |
| Platelet nadir                                                | Lowest recorded platelet count ( $10^9/L$ )                                                                                                                                                                                                                                                                                       |
| Time to platelet nadir                                        | Time to lowest recorded platelet count ( $10^9/L$ ) from snake bite (hours and minutes)                                                                                                                                                                                                                                           |
| Maximum LDH                                                   | Maximum LDH (U/L) and as ratio of ULN for reported reference range (times ULN)                                                                                                                                                                                                                                                    |
| Time to maximum LDH                                           | Time to maximum LDH (U/L) from snake bite (hours and minutes)                                                                                                                                                                                                                                                                     |
| <b>VICC</b>                                                   |                                                                                                                                                                                                                                                                                                                                   |
| Complete VICC                                                 | Undetectable fibrinogen by Clauss method; OR INR>3 and D-dimer at least 10 times assay ULN or >2.5mg/L                                                                                                                                                                                                                            |
| Partial VICC                                                  | Low but detectable fibrinogen, OR raised D-dimer AND maximum INR<3.0                                                                                                                                                                                                                                                              |
| <b>ISTH bleeding classification for non-surgical patients</b> |                                                                                                                                                                                                                                                                                                                                   |
| Major                                                         | Fatal bleeding; or symptomatic bleeding in a critical area or organ (intracranial, intraspinal, intraocular, retroperitoneal, intra-articular, pericardial, or intramuscular with compartment syndrome); or bleeding causing fall in haemoglobin $\geq 20g/L$ , or leading to transfusion $\geq 2$ units whole blood or red cells |
| Minor                                                         | All non-major bleeds                                                                                                                                                                                                                                                                                                              |
| <b>KDIGO AKI stage*</b>                                       |                                                                                                                                                                                                                                                                                                                                   |
| Stage 1                                                       | Day 1-7: creatinine 1.5-1.9 times baseline or $\geq 26.5 \mu\text{mol/L}$ increase; OR urine output $< 0.5\text{ml/kg/h}$ for 6-12 hours                                                                                                                                                                                          |
| Stage 2                                                       | Day 1-7: creatinine 2.0-2.9 times baseline; OR urine output $< 0.5\text{ml/kg/h}$ for $\geq 12$ hours                                                                                                                                                                                                                             |
| Stage 3                                                       | Day 1-7: creatinine 3.0 times baseline or increase to $\geq 353.6 \mu\text{mol/L}$ ; OR initiation of RRT; OR urine output $< 0.3\text{ml/kg/h}$ for $\geq 24$ hours or anuria for $\geq 12$ hours; OR in patients $< 18$ years old, decrease in eGFR to $< 35\text{ml/min/1.73m}^2$                                              |
| <b>ADQI ACD stage†</b>                                        |                                                                                                                                                                                                                                                                                                                                   |
| Stage 1                                                       | Continuation of AKI stage 1 between day 8-90                                                                                                                                                                                                                                                                                      |
| Stage 2                                                       | Continuation of AKI stage 2 between day 8-90                                                                                                                                                                                                                                                                                      |
| Stage 3                                                       | Continuation of AKI stage 3 between day 8-90                                                                                                                                                                                                                                                                                      |
| <b>CKD stage</b>                                              |                                                                                                                                                                                                                                                                                                                                   |
| Stage 1                                                       | eGFR $\geq 90\text{ml/min/1.73m}^2$ AND albuminuria, haematuria, a pathological abnormality or a structural abnormality                                                                                                                                                                                                           |
| Stage 2                                                       | eGFR 60-89ml/min/1.73m <sup>2</sup>                                                                                                                                                                                                                                                                                               |
| Stage 3a                                                      | eGFR 45-59ml/min/1.73m <sup>2</sup>                                                                                                                                                                                                                                                                                               |
| Stage 3b                                                      | eGFR 30-44ml/min/1.73m <sup>2</sup>                                                                                                                                                                                                                                                                                               |
| Stage 4                                                       | eGFR 15-29ml/min/1.73m <sup>2</sup>                                                                                                                                                                                                                                                                                               |
| Stage 5                                                       | eGFR $< 15\text{ml/min/1.73m}^2$                                                                                                                                                                                                                                                                                                  |

\*KDIGO AKI staging is by most concerning feature of either creatinine rise, urine output or use of renal replacement therapy, during day 1 to 7 from renal insult. †ADQI ACD staging is defined as ongoing AKI between day 8 to 90. MAHA: microangiopathic haemolytic anaemia; LDH: lactate dehydrogenase; VICC: venom induced consumption coagulopathy; INR: International normalised ratio; ULN: upper limit of normal; KDIGO: Kidney Disease: Improving Global Outcomes; AKI: acute kidney injury; ADQI: Acute Disease Quality Initiative; ACD: acute kidney disease; CKD: chronic kidney disease; eGFR: estimated glomerular filtration rate
