# Supplementary material for: Snakebite associated thrombotic microangiopathy: a systematic review of clinical features, outcomes, and evidence for interventions including plasmapheresis
Source: PubMed Central journal article supplement (PMC7748274; doi:10.1371/journal.pntd.0008936), 2020-12-08
Supplement: pntd.0008936.s006.pdf [file pntd.0008936.s006.pdf]

**S5 Table. Characteristics of included studies**

| Study                   | Study design              | Country       | n  | Snake (n)                                                                         |
|-------------------------|---------------------------|---------------|----|-----------------------------------------------------------------------------------|
| Acharya 1989 [1]        | CS                        | India         | 11 | Viper                                                                             |
| Ahlstrom 1991 [2]       | CR                        | United States | 1  | Pigmy rattlesnake                                                                 |
| Al Qahtani 2014 [3]     | CR                        | Saudi Arabia  | 1  | -                                                                                 |
| *Allen 2012 [4]         | Multi centre PCS          | Australia     | 15 | Brown snake ( <i>Pseudonaja</i> spp)                                              |
| Amaral 1985 [5]         | CS                        | Brazil        | 6  | <i>Bothrops jararaca</i> (4), <i>B. jararacussu</i> (1), <i>Bothrops</i> spp. (1) |
| Aung 1978 [6]           | CS                        | Burma         | 7  | Russells viper ( <i>Daboia russelii</i> )                                         |
| Basu 1977 [7]           | CS                        | India         | 9  | <i>D. russelii</i>                                                                |
| Benvenuti 2003 [8]      | CR                        | Brazil        | 1  | <i>Bothrops jararacussu</i>                                                       |
| Bucarechi 2019 [9]      | CR                        | Brazil        | 1  | <i>Bothrops jararaca</i>                                                          |
| *Casamento 2011 [10]    | CS                        | Australia     | 2  | Tiger snake <i>Notechis scutatus</i>                                              |
| Chugh 1989 [11]         | CS                        | India         | 2  | Viper (1), Saw-scaled viper (1)                                                   |
| †Chugh 1984 [12]        | CS                        | India         | 5  | <i>D. russelii</i> (2), unknown (3)                                               |
| †Chugh 1975 [13]        | CS                        | India         | 2  | <i>D. russelii</i> (2)                                                            |
| Cobcroft 1997 [14]      | CR                        | Australia     | 1  | Taipan <i>Oxyuranus scutellatus</i>                                               |
| ‡Date 1986 [15]         | CS                        | India         | 22 | <i>D. russelii</i> (15)                                                           |
| ‡Date 1982 [16]         | CS                        | India         | 9  | <i>D. russelii</i> (9)                                                            |
| ‡Date 1981 [17]         | CS                        | India         | 2  | <i>D. russelii</i> (2)                                                            |
| de Silva 2017 [18]      | CR                        | Sri Lanka     | 1  | Hump nosed viper ( <i>Hypnale</i> )                                               |
| Dineshkumar 2017 [19]   | CS                        | India         | 2  | <i>D. russelii</i> (1), Hump nosed viper (1)                                      |
| Ehelepola 2019 [20]     | CR                        | Sri Lanka     | 1  | <i>Hypnale hypnale</i>                                                            |
| *Enjeti 2018 [21]       | Nested CCS                | Australia     | 13 | <i>Pseudonaja</i> spp (8), unknown (5)                                            |
| Gn 2017 [22]            | CR                        | India         | 1  | Unknown                                                                           |
| Godavari 2016 [23]      | CS                        | India         | 2  | Unknown                                                                           |
| Gupta 1988 [24]         | CS                        | India         | 1  | Unknown                                                                           |
| Harris 1976 [25]        | CS                        | Australia     | 3  | Gwardar <i>D.nuchalis</i> (2), ? Dugite <i>D.nuchalis affinis</i> (1)             |
| Hatten 2013 [26]        | CR                        | United States | 1  | Great Lakes Bush Viper ( <i>Atheris nitschei</i> )                                |
| Herath 2012 [27]        | CS                        | Sri Lanka     | 7  | Hump nosed viper ( <i>Hypnale</i> sp)                                             |
| *Ho 2010 [28]           | CR                        | Australia     | 1  | Tiger snake <i>N. scutatus</i>                                                    |
| *Isbister 2007 [29]     | Multi centre PCS and CS   | Australia     | 6  | Western Brown Snake <i>P. nuchalis</i>                                            |
| *Johnston 2017 [30]     | Multi centre PCS          | Australia     | 6  | Taipan ( <i>Oxyuranus</i> spp)                                                    |
| Joseph 2007 [31]        | CS                        | India         | 2  | Hump-nosed viper ( <i>Hypnale hypnale</i> )                                       |
| Karthik 2004 [32]       | CR                        | India         | 1  | Unknown                                                                           |
| Karunatilake 2012 [33]  | CR                        | Sri Lanka     | 1  | <i>H. hypnale</i>                                                                 |
| Karunaranthne 2013 [34] | CR                        | Sri Lanka     | 1  | <i>H. hypnale</i>                                                                 |
| Keyler 2008 [35]        | CR                        | USA           | 1  | Lowland viper <i>P. superciliaris</i>                                             |
| Kularatne 2014 [36]     | CR                        | Sri Lanka     | 1  | <i>D. russelii</i>                                                                |
| Mahasandana 1980 [37]   | CS                        | Thailand      | 1  | <i>D. russelii</i>                                                                |
| Malaque 2019 [38]       | CS                        | Brazil        | 2  | <i>Bothrops jararaca</i>                                                          |
| Malbranche 2008 [39]    | CR                        | Caribbean     | 1  | Fer-de-Lance pit viper <i>B. lanceolatus</i>                                      |
| Merchant 1989 [40]      | CS                        | India         | 11 | NR                                                                                |
| Milani Junior 1997 [41] | Single centre RCS and PCS | Brazil        | 2  | <i>B. jararacussu</i>                                                             |
| Mitrakrishnan 2012 [42] | CR                        | Sri Lanka     | 1  | Merrem's hump nosed viper                                                         |
| §Mittal 1994 [43]       | CS                        | India         | 25 | Viperidae                                                                         |
| §Mittal 1986 [44]       | CS                        | India         | 21 | Viperidae                                                                         |
| ¶Mohan 2019 [45]        | Single centre RCS         | India         | 49 | <i>D. russelii</i> (1), NR (48)                                                   |
| ¶Mohan 2019 [46]        | CR                        | India         | 1  | <i>D. russelii</i> (1)                                                            |
| Namal 2019 [47]         | CS                        | Sri Lanka     | 4  | <i>Hypnale</i> spp (1), <i>H. hypnale</i> (3)                                     |
| Namal 2018 [48]         | CS                        | Sri Lanka     | 2  | <i>H. zara</i> (1), <i>H. nepa</i> (1)                                            |

**S5 Table. continued**

| Study                   | Study design      | Country            | n  | Snake (n)                                                                                                                                          |
|-------------------------|-------------------|--------------------|----|----------------------------------------------------------------------------------------------------------------------------------------------------|
| Namal 2017 [49]         | CR                | Sri Lanka          | 1  | <i>D. russelii</i>                                                                                                                                 |
| Namal 2017 [50]         | CR                | Sri Lanka          | 1  | <i>H. hypnale</i>                                                                                                                                  |
| Namal 2020 [51]         | CR                | Sri Lanka          | 1  | <i>H. zara</i>                                                                                                                                     |
| Namal 2019 [52]         | CR                | Sri Lanka          | 1  | <i>D. russelii</i>                                                                                                                                 |
| Namal 2018 [53]         | CR                | Sri Lanka          | 1  | <i>H. hypnale</i>                                                                                                                                  |
| Namal 2019 [54]         | Single centre PCS | Sri Lanka          | 29 | <i>H. hypnale</i> (12), <i>Hypnale</i> spp (17)                                                                                                    |
| Nicolson 1974 [55]      | CR                | UK                 | 1  | Boomslang/Sth African green tree snake <i>D. typus</i>                                                                                             |
| *Noutsos 2012 [56]      | CS                | Australia          | 31 | Brown snake ( <i>Pseudonaja</i> spp.) (23), Taipan ( <i>Oxyuranus</i> spp) (3), Tiger ( <i>Notechis scutatus</i> ) or tiger group (3), unknown (2) |
| Rahmani 2020 [57]       | CS                | Israel             | 2  | <i>Echis coloratus</i>                                                                                                                             |
| Rao 2019 [58]           | Single centre RCS | India              | 19 | NR                                                                                                                                                 |
| Satish 2017 [59]        | CR                | India              | 1  | <i>D. russelii</i>                                                                                                                                 |
| Schneemann 2004 [60]    | CS                | UK and Switzerland | 2  | Saharan horned viper <i>C. cerastes</i>                                                                                                            |
| Shastry 1977 [61]       | CS                | India              | 2  | Unknown                                                                                                                                            |
| Than-Than 1989 [62]     | CS                | Burma              | 2  | <i>D. russelii</i>                                                                                                                                 |
| Thillainathan 2015 [63] | CR                | Sri Lanka          | 1  | <i>H. hypnale</i>                                                                                                                                  |
| Uberoi 1991 [64]        | CR                | India              | 1  | Viperine                                                                                                                                           |
| Warrell 1975 [65]       | CS                | Nigeria            | 1  | Puff-adder <i>B. arietans</i>                                                                                                                      |
| Warrell 1977 [66]       | Single centre RCS | Nigeria            | 8  | <i>E. carinatus</i>                                                                                                                                |
| Warrell 2009 [67]       | CS                | Seriname           | 1  | Common lancehead pit viper ( <i>Bothrops atrox</i> )                                                                                               |
| Weiss 1973 [68]         | CR                | USA                | 1  | <i>E. carinatus</i>                                                                                                                                |
| White 1983 [69]         | CR                | Australia          | 1  | <i>P. nuchalis</i>                                                                                                                                 |
| Wijewickrama 2020 [70]  | Single centre PCS | Sri Lanka          | 47 | Daboia (10), <i>Hypnale</i> (18), unknown (17), NR (2)                                                                                             |
| Withana 2014 [71]       | CR                | Sri Lanka          | 1  | <i>H. hypnale</i>                                                                                                                                  |
| Zornig 2015 [72]        | CR                | Australia          | 1  | Eastern Brown <i>P. textilis</i>                                                                                                                   |

\*Studies with Australian Snakebite Project cases merged due to partial or complete case overlap. †‡§¶Studies with same first author merged due to partial or complete case overlap. CS: case series; CR: case report; PCS: prospective cohort study; CCS: case control study; RCS: retrospective cohort study; NR: not reported.

## References

1. Acharya VN, Khanna UB, Almeida AF, Merchant MR. Acute Renal Failure Due to Viperine Snake Bite as Seen in Tropical Western India. *Renal Failure*. 1989;11(1):33-5. doi: 10.3109/08860228909066944.
2. Ahlstrom NG, Luginbuhl W, Tisher CC. Acute anuric renal failure after pigmy rattlesnake bite. *Southern Medical Journal*. 1991;84(6):783-5. PubMed PMID: 2052975.
3. Al Qahtani M, Altheaby A, Al Anazi T, Al Saad K, Binsalih S, Al Helail M. Snake bite complicated by acute kidney injury secondary to necrotizing glomerulonephritis. *Saudi Journal of Kidney Diseases and Transplantation*. 2014;25(6):1259-62. doi: 10.4103/1319-2442.144263.
4. Allen GE, Brown SGA, Buckley NA, O'Leary MA, Page CB, Currie BJ, et al. Clinical effects and antivenom dosing in brown snake (*Pseudonaja* spp.) envenoming--Australian snakebite project (ASP-14). *Plos One*. 2012;7(12):e53188-e. doi: 10.1371/journal.pone.0053188. PubMed PMID: 23300888.
5. Amaral CF, Da Silva OA, Goody P, Miranda D. Renal cortical necrosis following *Bothrops jararaca* and *B. jararacussu* snake bite. *Toxicon*. 1985;23(6):877-85. Epub 1985/01/01. doi: 10.1016/0041-0101(85)90379-4. PubMed PMID: 4095703.
6. Aung-Khin M. Histological and ultrastructural changes of the kidney in renal failure after viper envenomation. *Toxicon*. 1978;16(1):71-5. doi: [https://doi.org/10.1016/0041-0101\(78\)90062-4](https://doi.org/10.1016/0041-0101(78)90062-4).
7. Basu J, Majumdar G, Dutta A, et al. Acute renal failure following snake bite (viper). *J Assoc Phys India*. 1977;25:883-90.
8. Benvenuti LA, França FOS, Barbaro KC, Nunes JR, Cardoso JLC. Pulmonary haemorrhage causing rapid death after *Bothrops jararacussu* snakebite: a case report. *Toxicon: Official Journal Of The International Society On Toxinology*. 2003;42(3):331-4. PubMed PMID: 14559086.

9. Bucaretschi F, Pimenta MMB, Borrasca-Fernandes CF, Prado CC, Capitani EMD, Hyslop S. Thrombotic microangiopathy following Bothrops jararaca snakebite: case report. *Clinical Toxicology*. 2019;57(4):294-9. doi: 10.1080/15563650.2018.1514621.
10. Casamento AJ, Isbister GK. Thrombotic microangiopathy in two tiger snake envenomations. *Anaesthesia And Intensive Care*. 2011;39(6):1124-7. PubMed PMID: 22165369.
11. Chugh KS. Snake-bite-induced acute renal failure in India. *Kidney International*. 1989;35(3):891-907. PubMed PMID: 2651763.
12. Chugh KS, Pal Y, Chakravarty RN. Acute renal failure following poisonous snake bite. *Am J Kidney Dis*. 1984;4:30-8.
13. Chugh KS, Aikat BK, Sharma BK, Dash SC, Mathew MT, Das KC. Acute renal failure following snakebite. *Am J Trop Med Hyg*. 1975;24:692-7.
14. Cobcroft RG, Williams A, Cook D, Williams DJ, Masci P. Hemolytic uremic syndrome following taipan envenomation with response to plasmapheresis. *Pathology*. 1997;29(4):399-402. PubMed PMID: 9423222.
15. Date A, Pulimood R, Jacob CK, Kirubakaran MG, Shastry JCM. Haemolytic-uraemic syndrome complicating snake bite. *Nephron*. 1986;42:89-90.
16. Date A, Shastry JCM. Renal ultrastructure in acute tubular necrosis following Russell's viper envenomation. *J Pathology*. 1982;137:225-41.
17. Date A, Shastry JCM. Renal ultrastructure in cortical necrosis following Russell's viper envenomation. *Journal of Tropical Medicine and Hygiene*. 1981;84:3-8.
18. de Silva NL, Gooneratne L, Wijewickrama E. Acute myocardial infarction associated with thrombotic microangiopathy following a hump-nosed viper bite: a case report. *Journal Of Medical Case Reports*. 2017;11(1):305. doi: 10.1186/s13256-017-1484-z. PubMed PMID: 29082854.
19. Dineshkumar T, Dhanapriya J, Sakthirajan R, Thirumalvalavan K, Kurien AA, Balasubramaniyan T, et al. Thrombotic microangiopathy due to Viperidae bite: Two case reports. *Indian J Nephrol*. 2017;27(2):161-4.
20. Ehelepola NDB, Karunathilaka CN, Liyanage GLHS, Wickramaarachchi WACB, Samarathunga JRPU, Dissanayake WP. An atypical clinical manifestation of a hump-nosed pit viper envenomation. *Case Reports in Medicine*. 2019;2019(Article ID 4172395). doi: <https://doi.org/10.1155/2019/4172395>.
21. Enjeti AK, Lincz LF, Seldon M, Isbister GK. Circulating microvesicles in snakebite patients with microangiopathy. *Research and Practice in Thrombosis and Haemostasis*. 2019;3(1):121-5. doi: 10.1002/rth2.12164.
22. Gn YM, Ponnusamy A, Thimma V. Snakebite induced thrombotic microangiopathy leading to renal cortical necrosis. *Case Reports in Nephrology*. 2017;10.1155/2017/1348749. doi: 10.1155/2017/1348749.
23. Godavari KSV. Hemolytic uremic syndrome - An unusual complication of snake envenomation. *University Journal of Medicine and Medical Sciences, The Tamil Nadu Dr MGR Medical University*. 2016;2(2).
24. Gupta A, Rao PV. Acute renal failure following snake bite. *J Assoc Physicians India*. 1988;36(8):501-3. Epub 1988/08/01. PubMed PMID: 3246503.
25. Harris AR, Hurst PE, Saker BM. Renal failure after snake bite. *The Medical Journal Of Australia*. 1976;2(11):409-11. PubMed PMID: 994917.
26. Hatten BW, Bueso A, French LK, Hendrickson RG, Horowitz BZ. Envenomation by the Great Lakes Bush Viper (*Atheris nitschei*). *Clinical Toxicology (Philadelphia, Pa)*. 2013;51(2):114-6. doi: 10.3109/15563650.2012.763134. PubMed PMID: 23327286.
27. Herath N, Wazil A, Kularatne S. Thrombotic microangiopathy and acute kidney injury in hump-nosed viper (*Hypnale* species) envenoming: A descriptive study in Sri Lanka. *Toxicon*. 2012;60:61-5.
28. Ho WK, Verner E, Dauer R, Duggan J. ADAMTS-13 activity, microangiopathic haemolytic anaemia and thrombocytopenia following snake bite envenomation. *Pathology*. 2010;42(2):200-2. doi: 10.3109/00313020903493955. PubMed PMID: 20085531.
29. Isbister GK, Little M, Cull G, McCoubrie D, Lawton P, Szabo F, et al. Thrombotic microangiopathy from Australian brown snake (*Pseudonaja*) envenoming. *Intern Med J*. 2007;37(8):523-8. PubMed PMID: 17640187.
30. Johnston CI, Ryan NM, O'Leary MA, Brown SGA, Isbister GK. Australian taipan (*Oxyuranus* spp.) envenoming: clinical effects and potential benefits of early antivenom therapy - Australian Snakebite Project (ASP-25). *Clinical Toxicology (Philadelphia, Pa)*. 2017;55(2):115-22. doi: 10.1080/15563650.2016.1250903. PubMed PMID: 27903075.
31. Joseph JK, Simpson ID, Menon NC, Jose MP, Kulkarni KJ, Raghavendra GB, et al. First authenticated cases of life-threatening envenoming by the hump-nosed pit viper (*Hypnale hypnale*) in India. *Trans R Soc Trop Med Hyg*. 2007;101(1):85-90. Epub 2006/07/15. doi: 10.1016/j.trstmh.2006.03.008. PubMed PMID: 16839578.
32. Karthik S, Phadke KD. Snakebite-induced acute renal failure. A case report and review of the literature. *Pediatric Nephrology (Berlin, Germany)*. 2004;19(9):1053-4. PubMed PMID: 15179568.

33. Karunatilake H, Nayakarathna T, Atapattu S, Saparamadu T, Dharmasena S. Thrombotic microangiopathy and fibrinolysis after hump-nosed viper envenomation. *The Ceylon Medical Journal*. 2012;57(1):45-6. doi: 10.4038/cmj.v57i1.4204. PubMed PMID: 22453713.
34. Karunarathne S, Udayakumara Y, Govindapala D, Fernando H. Type IV renal tubular acidosis following resolution of acute kidney injury and disseminated intravascular coagulation due to hump-nosed viper bite. *Indian J Nephrol*. 2013;23:294-6.
35. Keyler DE. Envenomation by the lowland viper (*Proatheris superciliaris*): severe case profile documentation. *Toxicon*. 2008;52(8):836-41. Epub 2008/10/28. doi: 10.1016/j.toxicon.2008.10.013. PubMed PMID: 18950654.
36. Kularatne S, Wimalasooriya S, Nazar K, Maduwage K. Thrombotic microangiopathy following Russell's viper (*Daboia russelii*) envenoming in Sri Lanka: a case report. *Ceylon Medical Journal*. 2014;59:29-30.
37. Mahasandana S, Rungruxsirivorn Y, Chantarangkul V. Clinical manifestations of bleeding following Russell's viper and Green pit viper bites in adults. *The Southeast Asian Journal Of Tropical Medicine And Public Health*. 1980;11(2):285-93. PubMed PMID: 7434080.
38. Malaque CMS, Duayer IF, Santoro ML. Acute kidney injury induced by thrombotic microangiopathy in two cases of Bothrops envenomation. *Clinical toxicology (Philadelphia, Pa)*. 2019;57(3):213-6. Epub 2018/11/15. doi: 10.1080/15563650.2018.1510129. PubMed PMID: 30430871.
39. Malbranche S, Piercecchi-Marti MD, Thomas L, Barbey C, Courcier D, Bucher B, et al. Case report: fatal diffuse thrombotic microangiopathy after a bite by the "fer-de-lance" pit viper (*Bothrops lanceolatus*) of Martinique. *Am J Trop Med Hyg*. 2008;78(6):856-61.
40. Merchant MR, Khanna UB, Almeida AF, Acharya VN, Mittal BV. Clinicopathological study of acute renal failure following viperine snake bite. *The Journal Of The Association Of Physicians Of India*. 1989;37(7):430-3.
41. Milani Júnior R, Jorge MT, de Campos FP, Martins FP, Bousso A, Cardoso JL, et al. Snake bites by the jararacuçu (*Bothrops jararacussu*): clinicopathological studies of 29 proven cases in São Paulo State, Brazil. *QJM: An International Journal of Medicine*. 1997;90(5):323-34. doi: 10.1093/qjmed/90.5.323.
42. Mitrakrishnan JY, Bandula CW, Mitrakrishnan CS, Somaratna K, Jeyalakshmy S. Haemolytic uremic syndrome a hitherto unreported complication of humpnosed viper envenomation. *Indian J of Hematol Blood Transfus*. 2012;29(2):116-8.
43. Mittal BV. Acute renal failure following poisonous snake bite. *J Postgrad Med*. 1994;40:123.
44. Mittal BV, Kinare SG, Acharya VN. Renal lesions following viper bites - a study of 14 years. *Indian J Med Res*. 1986;83:642-51.
45. Mohan G, Guduri PR, Shastry S, Kandasamy D. Thrombotic microangiopathy in hematotoxic snakebites and its impact on the prognosis: an entity often overlooked. *Journal of thrombosis and thrombolysis*. 2019;48(3):475-82. doi: 10.1007/s11239-019-01868-z. PubMed PMID: 31028512.
46. Mohan G, Guduri PR, Shastry S. Role of therapeutic plasma exchange in snake bite associated thrombotic microangiopathy-A case report with review of literature. *Journal of clinical apheresis*. 2019;34(4):507-9. Epub 2019/02/19. doi: 10.1002/jca.21691. PubMed PMID: 30779435.
47. Namal Rathnayaka R, Ranathunga PAN, Kularatne SA. Thrombotic Microangiopathy, Hemolytic Uremic Syndrome, and Thrombotic Thrombocytopenic Purpura Following Hump-nosed Pit Viper (Genus: *Hypnale*) Envenoming in Sri Lanka. *Wilderness & environmental medicine*. 2019;30(1):66-78. Epub 2019/01/31. doi: 10.1016/j.wem.2018.10.003. PubMed PMID: 30711421.
48. Namal Rathnayaka RMMK, Ranathunga AN, Kularatne SAM, Rajapakse J, Ranasinghe S, Jayathunga R. Microangiopathic Hemolytic Anemia Following Three Different Species of Hump-Nosed Pit Viper (Genus *Hypnale*) Envenoming in Sri Lanka. *Wilderness & Environmental Medicine*. 2018;29(1):94-101. doi: 10.1016/j.wem.2017.11.003.
49. Namal Rathnayaka RMMK, Kularatne SAM, Kumarasinghe KDM, Ranaweera J, Nishanthi Ranathunga PEA. Ischemic brain infarcts and intracranial haemorrhages following Russell's viper (*Daboia russelii*) bite in Sri Lanka. *Toxicon*. 2017;125:70-3. doi: <https://doi.org/10.1016/j.toxicon.2016.11.253>.
50. Namal Rathnayaka RMMK, Kularatne SAM, Ranathunga AN, Kumarasinghe M, Rajapakse J, Ranasinghe S. Prolonged Coagulopathy, Echymoses, and Microangiopathic Hemolytic Anemia Following Hump-Nosed Pit Viper (*Hypnale hypnale*) Bite in Sri Lanka. *Wilderness & Environmental Medicine*. 2017;28(3):253-8. doi: 10.1016/j.wem.2017.05.005. PubMed PMID: 28755820.
51. Namal Rathnayaka RMMK, Nishanthi Ranathunga PEA, Kularatne SAM. Thrombotic Microangiopathy Following *Hypnale zara* (Hump-Nosed Pit Viper) Envenoming: The First Known Case Report from Sri Lanka. *Wilderness & Environmental Medicine*. 2020;31(1):71-7. doi: 10.1016/j.wem.2019.08.009.
52. Namal Rathnayaka RMMK, Nishanthi Ranathunga PEA. Thrombotic microangiopathy and hemolytic uremic syndrome following Russell's viper (*Daboia russelii*) bite. *Ratnapura Clinical Society Journal*. 2019:23-32.

53. Namal Rathnayaka R, Nishanthi Ranathunga PEA, Ranaweera J, Jayasekara K, Kularatne SAM. Cardiac arrest and atrial fibrillation in a patient after hump-nosed pit viper (*Hypnale hypnale*) bite. *Toxicon*. 2018;148:33-9. Epub 2018/04/03. doi: 10.1016/j.toxicon.2018.03.014. PubMed PMID: 29608921.
54. Namal Rathnayaka RMMK, Ranathunga PEAN, Kularatne SAM. Kidney injury following envenoming by hump-nosed pit viper (Genus: *Hypnale*) in Sri Lanka: proven and probable cases. *Transactions of the Royal Society of Tropical Medicine and Hygiene*. 2019;113(3):131-42. doi: 10.1093/trstmh/try120. PubMed PMID: 30544230.
55. Nicolson IC, Ashby PA, Johnson ND, Versey J, Slater L. Boomslang bite with haemorrhage and activation of complement by the alternate pathway. *Clinical And Experimental Immunology*. 1974;16(2):295-300. PubMed PMID: 4469217.
56. Noutsos T, Currie B, Brown SG, Isbister GK, editors. Thrombotic microangiopathy due to snake envenomation: a large case series. HAA-APSTH Annual Scientific Meeting (Haematology Society of Australia and New Zealand & Australian and New Zealand Society of Blood Transfusion & Australasian Society of Thrombosis and Haemostasis & Asia Pacific Society of Thrombosis and Haemostasis); 2012; Melbourne, Victoria, Australia.
57. Rahmani T-RI, Nasasra T, Fuchs L, Almog Y, Lurie Y, Galante O. Acute thrombotic microangiopathic kidney injury due to *Echis coloratus* envenomation. *Clinical Toxicology*. 2020;58(4):284-6. doi: 10.1080/15563650.2019.1629450.
58. Rao IR, Prabhu AR, Nagaraju SP, Rangaswamy D. Thrombotic Microangiopathy: An Under-Recognised Cause of Snake-bite-related Acute Kidney Injury. *Indian journal of nephrology*. 2019;29(5):324-8. doi: 10.4103/ijn.IJN\_280\_18. PubMed PMID: 31571738.
59. Satish H, Jayachandran S, Priyamvada PS, Keepanasseril A, Stravankumar J, Sankar G, et al. Snakebite-induced acute kidney injury requiring dialysis in second trimester of pregnancy: successful outcomes in a therapeutic quagmire. *Saudi journal of kidney diseases and transplantation : an official publication of the Saudi Center for Organ Transplantation, Saudi Arabia*. 2017;28(2):437-40.
60. Schneemann M, Cathomas R, Laidlaw ST, El Nahas AM, Theakston RD, Warrell DA. Life-threatening envenoming by the Saharan horned viper (*Cerastes cerastes*) causing micro-angiopathic haemolysis, coagulopathy and acute renal failure: clinical cases and review. *QJM : monthly journal of the Association of Physicians*. 2004;97(11):717-27. Epub 2004/10/22. doi: 10.1093/qjmed/hch118. PubMed PMID: 15496528.
61. Shastri JCM, Date A, Carman RH, Johnny KV. Renal failure following snake bite. A clinicopathological study of nineteen patients. *Am J Trop Med Hygiene*. 1977;26:1032-8.
62. Than-Than., Francis N, Tin Nu S, Myint L, Tun P, Soe-Soe, et al. Contribution of focal haemorrhage and microvascular fibrin deposition to fatal envenoming by Russell's viper (*Vipera russelli siamensis*) in Burma. *Acta Trop*. 1989;46:23-38.
63. Thillainathan S, Priyangika D, Marasinghe I, Kanapathippillai K, Premawansa G. Rare cardiac sequelae of a hump-nosed viper bite. *BMC Research Notes*. 2015;8:437-. doi: 10.1186/s13104-015-1426-z. PubMed PMID: 26369415.
64. Uberoi HS, Achuthan AC, Kasthuri AS, Kolhe VS, Rao KR, Dugal JS. Hypopituitarism following snake bite. *The Journal Of The Association Of Physicians Of India*. 1991;39(7):579-80. PubMed PMID: 1800512.
65. Warrell DA, Ormerod LD, Davidson NM. Bites by puff-adder (*Bitis arietans*) in Nigeria, and value of antivenom. *British Medical Journal*. 1975;4(5998):697-700. PubMed PMID: 1203728.
66. Warrell DA, Davidson N, Greenwood BM, Ormerod LD, Pope HM, Watkins BJ, et al. Poisoning by bites of the saw-scaled or carpet viper (*Echis carinatus*) in Nigeria. *The Quarterly Journal Of Medicine*. 1977;46(181):33-62. PubMed PMID: 866568.
67. Warrell DA. Commissioned article: management of exotic snakebites. *QJM: An International Journal of Medicine*. 2009;102(9):593-601. doi: 10.1093/qjmed/hcp075.
68. Weiss HJ, Phillips LL, Hopewell WS, Phillips G, Christy NP, Nitti JF. Heparin therapy in a patient bitten by a saw-scaled viper (*Echis carinatus*), a snake whose venom activates prothrombin. *American Journal of Medicine*. 1973;54:653-??
69. White J, Fassett R. Acute renal failure and coagulopathy after snakebite. *Medical Journal of Australia*. 1983;2:142-3.
70. Wijewickrama ES, Gooneratne LV, Gnanathanan A, Gawarammana I, Gunatilake M, Isbister GK. Thrombotic microangiopathy and acute kidney injury following Sri Lankan *Daboia russelii* and *Hypnale* species envenoming. *Clinical Toxicology*. 2020;1-7. doi: 10.1080/15563650.2020.1717509.
71. Withana M, Rodrigo C, Gnanathanan A, Gooneratne L. Presumptive thrombotic thrombocytopenic purpura following a hump-nosed viper (*Hypnale hypnale*) bite: a case report. *J Venom Anim Toxins Incl Trop Dis*. 2014;20:26.
72. Zornig B. Acute kidney injury secondary to Eastern brown snake (*Pseudonaja textilis*) bite: a case study. *Renal Society of Australasia Journal*. 2015;11(2):56-61.
