# Supplementary material for: Snakebite associated thrombotic microangiopathy: a systematic review of clinical features, outcomes, and evidence for interventions including plasmapheresis
Source: PubMed Central journal article supplement (PMC7748274; doi:10.1371/journal.pntd.0008936), 2020-12-08
Supplement: pntd.0008936.s007.pdf [file pntd.0008936.s007.pdf]

**S6 Table continued**

| Author        | Year | Study design              | Total study duration (recruitment) | Selection | Ascertainment (exposure) | Ascertainment (AKI) | Ascertainment (survival) | Ascertainment (other end organ damage) | Ascertainment (DFS) | Causality | Reporting |
|---------------|------|---------------------------|------------------------------------|-----------|--------------------------|---------------------|--------------------------|----------------------------------------|---------------------|-----------|-----------|
| Isbister      | 2007 | multi centre PCS          | 4 years                            | yes       | yes                      | yes                 | yes                      | yes                                    | yes                 | unclear   | complete  |
| Johnston      | 2017 | multi centre PCS          | 13 years (2003-2016)               | yes       | yes                      | yes                 | unclear                  | unclear                                | unclear             | unclear   | poor      |
| Joseph        | 2007 | case series               | n/a                                | unclear   | yes                      | yes                 | yes                      | unclear                                | yes                 | unclear   | partial   |
| Karthik       | 2003 | case report               | n/a                                | unclear   | yes                      | yes                 | yes                      | yes                                    | yes                 | unclear   | complete  |
| Karunatilake  | 2012 | case report               | n/a                                | unclear   | yes                      | yes                 | unclear                  | unclear                                | unclear             | unclear   | partial   |
| Karunaranthne | 2013 | case report               | n/a                                | unclear   | yes                      | yes                 | yes                      | yes                                    | yes                 | yes       | partial   |
| Keyler        | 2008 | case report               | n/a                                | unclear   | yes                      | yes                 | yes                      | yes                                    | yes                 | yes       | complete  |
| Kularatne     | 2014 | case report               | n/a                                | unclear   | yes                      | yes                 | yes                      | no                                     | yes                 | no        | complete  |
| Mahasandana   | 1980 | case series               | 2 years                            | unclear   | yes                      | yes                 | yes                      | unclear                                | no                  | no        | partial   |
| Malaque       | 2019 | case series               | n/a                                | unclear   | unclear                  | yes                 | yes                      | yes                                    | yes                 | yes       | complete  |
| Malbranque    | 2008 | case report               | n/a                                | unclear   | yes                      | yes                 | yes                      | yes                                    | yes                 | no        | complete  |
| Merchant      | 1989 | case series               | 8 years (1977-1985)                | yes       | unclear                  | yes                 | no                       | no                                     | no                  | unclear   | partial   |
| Milani Junior | 1997 | single centre RCS and PCS | 20 years                           | yes       | yes                      | yes                 | yes                      | yes                                    | yes                 | yes       | complete  |
| Mitrakrishnan | 2012 | case report               | n/a                                | unclear   | unclear                  | yes                 | yes                      | yes                                    | yes                 | yes       | partial   |
| Mittal        | 1986 | case series               | 14 years (1971-1984)               | yes       | yes                      | yes                 | yes                      | no                                     | no                  | unclear   | poor      |
| Mittal        | 1994 | case series               | 23 years (1971-1993)               | yes       | yes                      | yes                 | no                       | no                                     | no                  | no        | partial   |
| Mohan         | 2019 | case report               | n/a                                | unclear   | unclear                  | yes                 | yes                      | yes                                    | yes                 | yes       | complete  |
| Mohan         | 2019 | single centre RCS         | 3 years                            | yes       | unclear                  | yes                 | yes                      | yes                                    | no                  | no        | poor      |
| Namal         | 2019 | case series               | n/a                                | unclear   | yes                      | yes                 | yes                      | yes                                    | yes                 | unclear   | complete  |
| Namal         | 2018 | case series               | n/a                                | unclear   | yes                      | yes                 | yes                      | yes                                    | yes                 | yes       | complete  |
| Namal         | 2017 | case report               | n/a                                | no        | yes                      | yes                 | yes                      | yes                                    | yes                 | yes       | complete  |
| Namal         | 2017 | case report               | n/a                                | unclear   | yes                      | yes                 | yes                      | unclear                                | yes                 | unclear   | partial   |
| Namal         | 2020 | case report               | n/a                                | no        | yes                      | yes                 | yes                      | yes                                    | yes                 | unclear   | partial   |
| Namal         | 2019 | case report               | n/a                                | no        | yes                      | yes                 | yes                      | unclear                                | yes                 | unclear   | partial   |
| Namal         | 2018 | case report               | n/a                                | no        | yes                      | yes                 | yes                      | yes                                    | yes                 | unclear   | complete  |
| Namal         | 2019 | single centre PCS         | 4 years (2014-2018)                | yes       | yes                      | yes                 | unclear                  | unclear                                | no                  | unclear   | partial   |
| Nicolson      | 1974 | case report               | n/a                                | unclear   | yes                      | yes                 | yes                      | unclear                                | yes                 | yes       | complete  |

**S6 Table continued**

| Author        | Year | Study design      | Total study duration (recruitment) | Selection | Ascertainment (exposure) | Ascertainment (AKI) | Ascertainment (survival) | Ascertainment (other end organ damage) | Ascertainment (DFS) | Causality | Reporting |
|---------------|------|-------------------|------------------------------------|-----------|--------------------------|---------------------|--------------------------|----------------------------------------|---------------------|-----------|-----------|
| Noutsos       | 2012 | case series       | 8 years (2004-2012)                | yes       | yes                      | yes                 | yes                      | unclear                                | yes                 | unclear   | complete  |
| Rahmani       | 2020 | case series       | n/a                                | unclear   | yes                      | yes                 | yes                      | unclear                                | yes                 | yes       | complete  |
| Rao           | 2019 | single centre RCS | 6 years (2012 to 2017)             | yes       | yes                      | yes                 | yes                      | yes                                    | yes                 | yes       | partial   |
| Satish        | 2017 | case report       | n/a                                | unclear   | yes                      | yes                 | yes                      | unclear                                | yes                 | yes       | complete  |
| Schneemann    | 2004 | case series       | n/a                                | unclear   | yes                      | yes                 | yes                      | yes                                    | yes                 | unclear   | complete  |
| Shastry       | 1977 | case series       | n/a                                | unclear   | yes                      | yes                 | unclear                  | unclear                                | unclear             | unclear   | poor      |
| Than-Than     | 1989 | case series       | 2 years                            | yes       | yes                      | unclear             | yes                      | yes                                    | yes                 | unclear   | partial   |
| Thillainathan | 2015 | case report       | n/a                                | unclear   | yes                      | yes                 | yes                      | yes                                    | yes                 | yes       | partial   |
| Uberoi        | 1991 | case report       | n/a                                | no        | yes                      | yes                 | yes                      | yes                                    | yes                 | unclear   | partial   |
| Warrell       | 1975 | case series       | 3 years                            | unclear   | yes                      | unclear             | yes                      | yes                                    | yes                 | unclear   | poor      |
| Warrell       | 1977 | single centre RCS | 3 years                            | yes       | yes                      | unclear             | unclear                  | unclear                                | unclear             | no        | partial   |
| Warrell       | 2009 | case series       | n/a                                | unclear   | yes                      | yes                 | yes                      | unclear                                | yes                 | no        | partial   |
| Weiss         | 1973 | case report       | n/a                                | unclear   | yes                      | yes                 | yes                      | unclear                                | yes                 | yes       | complete  |
| White         | 1983 | case report       | n/a                                | unclear   | yes                      | yes                 | yes                      | unclear                                | yes                 | unclear   | complete  |
| Wijewickrama  | 2020 | single centre PCS | 2 years                            | yes       | yes                      | yes                 | yes                      | no                                     | yes                 | unclear   | complete  |
| Withana       | 2014 | case report       | n/a                                | unclear   | yes                      | yes                 | yes                      | yes                                    | yes                 | yes       | complete  |
| Zornig        | 2015 | case report       | n/a                                | unclear   | yes                      | yes                 | yes                      | yes                                    | yes                 | yes       | complete  |

AKI: acute kidney injury; DFS: dialysis free survival; PCS: prospective cohort study; RCS: retrospective cohort study; CCS: case control study

1. Murad MH, Sultan S, Haffar S, F B. Methodological quality and synthesis of case series and case reports. *BMJ Evid-Based Med.* 2018;23(2):60-3.
