# Supplementary material for: Snakebite associated thrombotic microangiopathy: a systematic review of clinical features, outcomes, and evidence for interventions including plasmapheresis
Source: PubMed Central journal article supplement (PMC7748274; doi:10.1371/journal.pntd.0008936), 2020-12-08
Supplement: pntd.0008936.s009.pdf [file pntd.0008936.s009.pdf]

**S8 Table. Dialysis free survival for patients with AKI requiring dialysis, for studies with a low risk of selection bias reporting intervention with plasmapheresis**

| Outcome by study                                  | TPE n/N (%) | No TPE n (%) | Calculated odds ratio | 95% CI      | p value |
|---------------------------------------------------|-------------|--------------|-----------------------|-------------|---------|
| Australian Snakebite Project Studies (2012) [1-7] |             |              |                       |             |         |
| D-AKI                                             | 5           | 8            | -                     | -           | -       |
| DFS                                               | 5/5 (100%)  | 8/8 (100%)   | 0.65                  | 0.01-37.67  | 0.83    |
| ESKD                                              | 0/5 (0%)    | 0/8 (0%)     | 1.55                  | 0.03-89.96  | 0.83    |
| Death                                             | 0/5 (0%)    | 0/8 (0%)     | 1.55                  | 0.03-89.96  | 0.83    |
| Rao (2019) [8]                                    |             |              |                       |             |         |
| D-AKI                                             | 3           | 12           | -                     | -           | -       |
| DFS                                               | 3/3 (100%)  | 9/12 (75%)   | 2.58                  | 0.10-63.69  | 0.56    |
| ESKD                                              | 0/3 (0%)    | 2/12 (17%)   | 0.60                  | 0.02-15.76  | 0.76    |
| Death                                             | 0/3 (0%)    | 1/12 (8%)    | 1.09                  | 0.04-33.38  | 0.96    |
| Wijerickrama (2020) [9]                           |             |              |                       |             |         |
| D-AKI                                             | 5           | 23           | -                     | -           | -       |
| DFS                                               | 5/5 (100%)  | 21/23 (91%)  | 1.28                  | 0.05-30.68  | 0.88    |
| ESKD                                              | 0/5 (0%)    | 0/23 (0%)    | 4.27                  | 0.08-240.01 | 0.48    |
| Death                                             | 0/5 (0%)    | 2/23 (9%)    | 0.78                  | 0.03-18.75  | 0.88    |

## References

1. Noutsos T, Currie B, Brown SG, Isbister GK, editors. Thrombotic microangiopathy due to snake envenomation: a large case series. HAA-APSTH Annual Scientific Meeting (Haematology Society of Australia and New Zealand & Australian and New Zealand Society of Blood Transfusion & Australasian Society of Thrombosis and Haemostasis & Asia Pacific Society of Thrombosis and Haemostasis); 2012; Melbourne, Victoria, Australia.
2. Allen GE, Brown SGA, Buckley NA, O'Leary MA, Page CB, Currie BJ, et al. Clinical effects and antivenom dosing in brown snake (*Pseudonaja* spp.) envenoming--Australian snakebite project (ASP-14). *Plos One*. 2012;7(12):e53188-e. doi: 10.1371/journal.pone.0053188. PubMed PMID: 23300888.
3. Isbister GK, Little M, Cull G, McCoubrie D, Lawton P, Szabo F, et al. Thrombotic microangiopathy from Australian brown snake (*Pseudonaja*) envenoming. *Intern Med J*. 2007;37(8):523-8. PubMed PMID: 17640187.
4. Enjeti AK, Lincz LF, Seldon M, Isbister GK. Circulating microvesicles in snakebite patients with microangiopathy. *Research and Practice in Thrombosis and Haemostasis*. 2019;3(1):121-5. doi: 10.1002/rth2.12164.
5. Johnston CI, Ryan NM, O'Leary MA, Brown SGA, Isbister GK. Australian taipan (*Oxyuranus* spp.) envenoming: clinical effects and potential benefits of early antivenom therapy - Australian Snakebite Project (ASP-25). *Clinical Toxicology (Philadelphia, Pa)*. 2017;55(2):115-22. doi: 10.1080/15563650.2016.1250903. PubMed PMID: 27903075.
6. Casamento AJ, Isbister GK. Thrombotic microangiopathy in two tiger snake envenomations. *Anaesthesia And Intensive Care*. 2011;39(6):1124-7. PubMed PMID: 22165369.

7. Ho WK, Verner E, Dauer R, Duggan J. ADAMTS-13 activity, microangiopathic haemolytic anaemia and thrombocytopenia following snake bite envenomation. *Pathology*. 2010;42(2):200-2. doi: 10.3109/00313020903493955. PubMed PMID: 20085531.
8. Rao IR, Prabhu AR, Nagaraju SP, Rangaswamy D. Thrombotic Microangiopathy: An Under-Recognised Cause of Snake-bite-related Acute Kidney Injury. *Indian journal of nephrology*. 2019;29(5):324-8. doi: 10.4103/ijn.IJN\_280\_18. PubMed PMID: 31571738.
9. Wijewickrama ES, Gooneratne LV, Gnanathanan A, Gawarammana I, Gunatilake M, Isbister GK. Thrombotic microangiopathy and acute kidney injury following Sri Lankan *Daboia russelii* and *Hypnale* species envenoming. *Clinical Toxicology*. 2020:1-7. doi: 10.1080/15563650.2020.1717509.
