# Supplementary material for: Snakebite associated thrombotic microangiopathy: a systematic review of clinical features, outcomes, and evidence for interventions including plasmapheresis
Source: PubMed Central journal article supplement (PMC7748274; doi:10.1371/journal.pntd.0008936), 2020-12-08
Supplement: pntd.0008936.s010.pdf [file pntd.0008936.s010.pdf]

**S9 Table. Reviewer agreement - Cohen's kappa statistic for selection of included studies and data extraction for outcomes and interventions**

| <b>Variable</b>                               | <b>Cohen's kappa statistic</b> | <b>95% confidence interval</b> |
|-----------------------------------------------|--------------------------------|--------------------------------|
| Study selection for systematic review         | 0.92                           | (0.86-0.97)                    |
| Data extraction – AKI outcome                 | 0.90                           | (0.83-0.97)                    |
| Data extraction – DFS outcome                 | 0.93                           | (0.87-0.96)                    |
| Data extraction – overall survival outcome    | 0.80                           | (0.75-0.86)                    |
| Data extraction – other organ damage outcome  | 0.71                           | (0.64-0.79)                    |
| Data extraction – plasmapheresis intervention | 0.83                           | (0.77-0.88)                    |
| Data extraction – antivenom intervention      | 0.87                           | (0.82-0.92)                    |

AKI: acute kidney injury; DFS: dialysis free survival
