# Supplementary material for: Snakebite associated thrombotic microangiopathy: a systematic review of clinical features, outcomes, and evidence for interventions including plasmapheresis
Source: PubMed Central journal article supplement (PMC7748274; doi:10.1371/journal.pntd.0008936), 2020-12-08

**S2 Fig. Lowest recorded haemoglobin by study**  
(median, range)

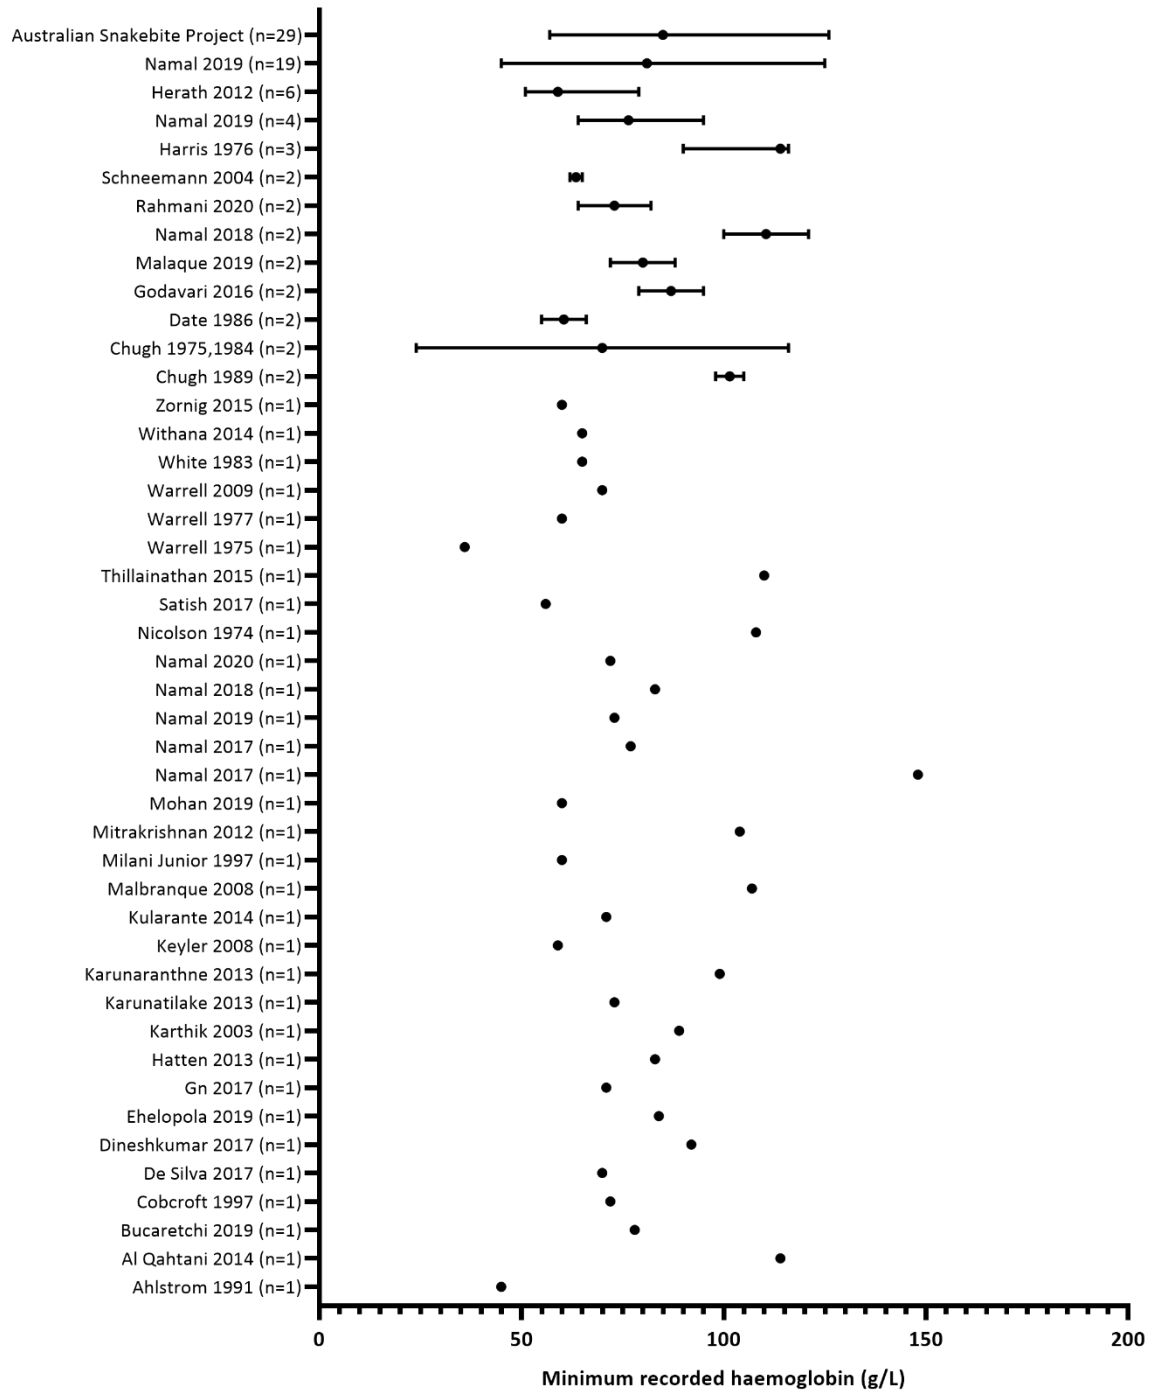

Supplement: pntd.0008936.s012.pdf [file pntd.0008936.s012.pdf]
